# Supplementary material for: Phototransistor based on single In2Se3nanosheets
Source: Royal Society of Chemistry journal article supplement (doi:10.1039/c4nr04404e), 2014-10-07
Supplement: c4nr04404e1.pdf [file c4nr04404e1.pdf]

Supplementary Information for

## **Phototransistor Based on Single In<sub>2</sub>Se<sub>3</sub> Nanosheet**

Qin-Liang Li, Chang-Hai Liu, Yu-Ting Nie, Wen-Hua Chen, Xu Gao, Xu-Hui Sun\* and Sui-Dong  
Wang\*

Institute of Functional Nano & Soft Materials (FUNSOM), Soochow University, Suzhou, Jiangsu  
215123, P. R. China

\*E-mail: [wangsd@suda.edu.cn](mailto:wangsd@suda.edu.cn); [xhsun@suda.edu.cn](mailto:xhsun@suda.edu.cn)

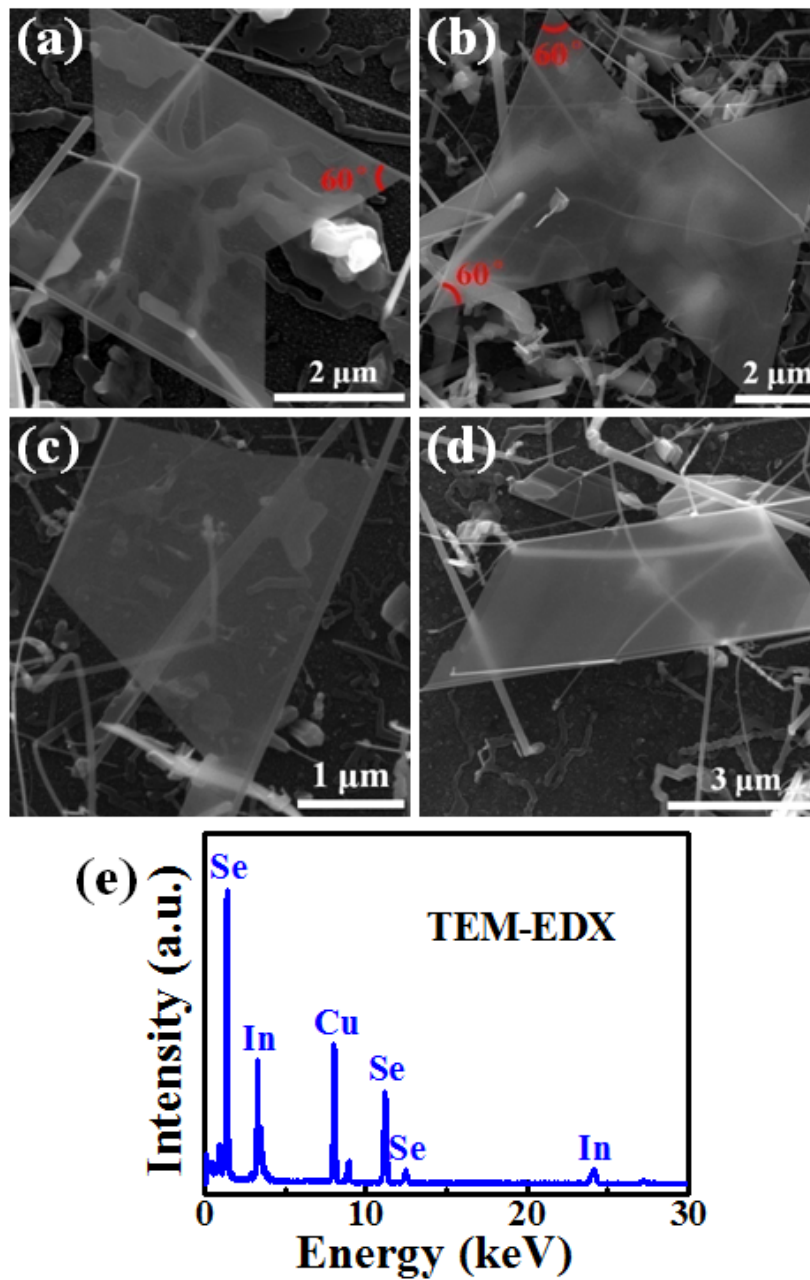

**Fig. S1** (a, b, c, d) SEM images of typical micrometer-sized  $\text{In}_2\text{Se}_3$  nanosheets. (e) TEM-EDX spectrum of single  $\text{In}_2\text{Se}_3$  nanosheet, where Cu signal is from TEM grid.

**Table S1** Scherrer sizes of  $\text{In}_2\text{Se}_3$  nanosheets derived from XRD pattern in Fig. 1(b).

| Crystal Plane | Scherrer Size (nm) |
|---------------|--------------------|
| (002)         | 119                |
| (004)         | 103                |
| (101)         | 127                |
| (102)         | 165                |
| (104)         | 145                |
| (008)         | 136                |
| (110)         | 104                |
| (0010)        | 122                |
| (205)         | 207                |

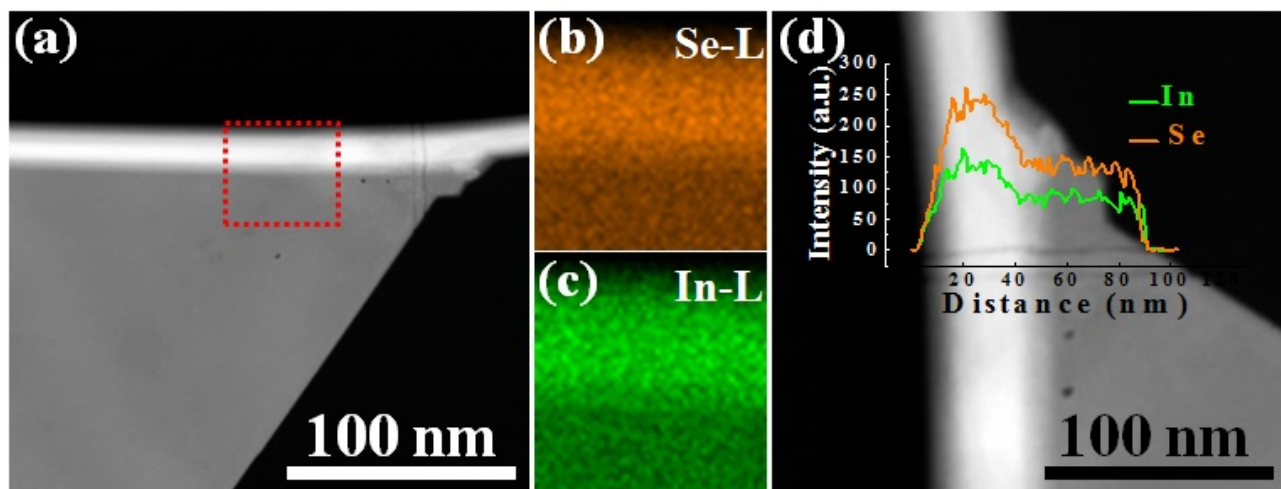

**Fig. S2** (a) STEM image of an  $\text{In}_2\text{Se}_3$  nanosheet epitaxially grown from an  $\text{In}_2\text{Se}_3$  nanowire, showing spatially resolved EDX elemental mapping for (b) Se and (c) In of the selected area depicted in (a). (d) EDX line profiles for Se and In of the  $\text{In}_2\text{Se}_3$  nanosheet.

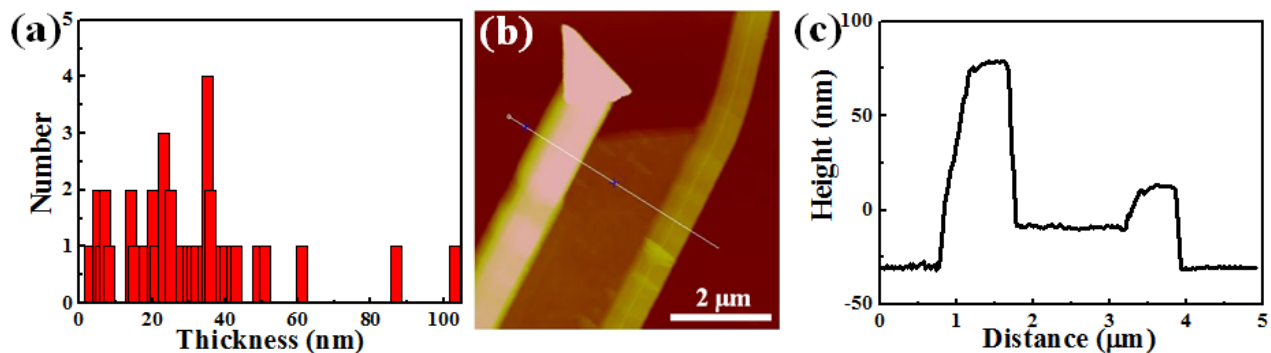

**Fig. S3** (a) Statistics in thickness of In<sub>2</sub>Se<sub>3</sub> nanosheets. (b) AFM image of single In<sub>2</sub>Se<sub>3</sub> nanosheet. (c) Cross-sectional line profile of the In<sub>2</sub>Se<sub>3</sub> nanosheet shown in (b).

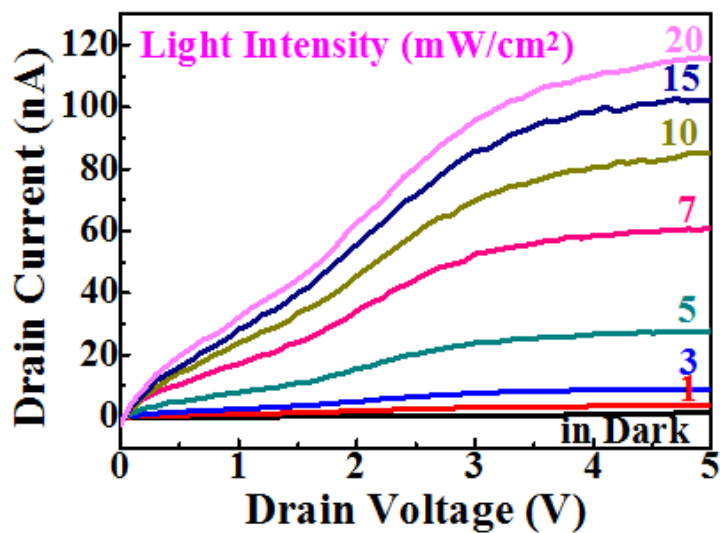

**Fig. S4** Photoresponse of an In<sub>2</sub>Se<sub>3</sub> nanosheet phototransistor at  $V_{GS} = 0$  V, where incident light intensity is from 1 mW/cm<sup>2</sup> to 20 mW/cm<sup>2</sup>.
